# Supplementary material
Source: Royal Society of Chemistry journal article supplement (doi:10.1039/d6ta01675h)
Supplement: d6ta01675h1.pdf [file d6ta01675h1.pdf]

**SUPPORTING INFORMATION**

**Design and synthesis of a heteroatom-rich Ni-MOF with a rare bis( $\mu$ -aqua) core for polarity-mediated heterogeneous catalysis**

Sumedha Rana, Gouri Chakraborty and Sanjay K. Mandal\*

Department of Chemical Sciences, Indian Institute of Science Education and Research Mohali, Mohali, Punjab 140306, India

\*Author for correspondence:

Prof. Sanjay K. Mandal

E-mail: [sanjaymandal@iisermohali.ac.in](mailto:sanjaymandal@iisermohali.ac.in)

## TABLE OF CONTENTS

| SECTION NO. | DESCRIPTION                                                                                                                                                                                          | PAGE NO.     |
|-------------|------------------------------------------------------------------------------------------------------------------------------------------------------------------------------------------------------|--------------|
| <b>S1</b>   | Materials and physical measurements                                                                                                                                                                  | S-3 to S-4   |
| <b>S2</b>   | Synthesis of <b>Ni-MOF (Scheme S1)</b>                                                                                                                                                               | S-4          |
| <b>S3</b>   | Crystallographic data and structure refinement parameters of <b>Ni-MOF (Table S1)</b>                                                                                                                | S-4          |
| <b>S4</b>   | ORTEP diagrams of <b>Ni-MOF (Fig. S1)</b>                                                                                                                                                            | S-5          |
| <b>S5</b>   | Nitrogen sorption isotherm at 77 K ( <b>Fig. S2</b> )                                                                                                                                                | S-5          |
| <b>S6</b>   | FTIR spectrum of <b>Ni-MOF (Fig. S3)</b>                                                                                                                                                             | S-6          |
| <b>S7</b>   | DRS and Tauc plot of <b>Ni-MOF (Fig. S4)</b>                                                                                                                                                         | S-6          |
| <b>S8</b>   | <sup>1</sup> H NMR analysis of the crude product and <sup>1</sup> H and <sup>13</sup> C NMR spectra of product obtained from the reaction of 2-aminobenzamide and benzaldehyde ( <b>Fig. S5-S6</b> ) | S-7 to S-8   |
| <b>S9</b>   | <sup>1</sup> H and <sup>13</sup> C NMR spectra of isolated products from diverse substrates obtained after column chromatography ( <b>Fig. S7-S14</b> )                                              | S-9 to S-16  |
| <b>S10</b>  | Literature comparison showing catalysis performance of <b>Ni-MOF (Table S2)</b>                                                                                                                      | S-16         |
| <b>S11</b>  | Catalyst recyclability assessment ( <b>Fig. S15</b> )                                                                                                                                                | S-17         |
| <b>S12</b>  | FESEM micrographs, PXRD and FTIR spectrum before and after catalysis ( <b>Fig. S16</b> )                                                                                                             | S-17         |
| <b>S13</b>  | XPS profiles of <b>Ni-MOF</b> after catalysis ( <b>Fig. S17</b> )                                                                                                                                    | S-18         |
| <b>S14</b>  | EDX analysis and elemental mapping of post-catalysis filtrate ( <b>Fig. S18</b> )                                                                                                                    | S-18         |
| <b>S15</b>  | Perspective views of the <b>Ni-MOF</b> structure ( <b>Fig. S19</b> ) and Binding energy profiles after interaction with benzaldehyde and 2-aminobenzamide ( <b>Fig. S20</b> )                        | S-19         |
| <b>S15</b>  | Model compounds <b>Ni-O</b> and <b>Ni-R</b> for QTAIM analysis ( <b>Fig. S21</b> ) and Optimized BCP parameters ( <b>Table S3</b> )                                                                  | S-19 to S-20 |
| <b>S16</b>  | FTIR spectra of <b>Ni-MOF</b> and pyridine-treated <b>Ni-MOF (Fig. S22)</b>                                                                                                                          | S-20         |
| <b>S17</b>  | Spectroscopic Evidence of interaction between benzaldehyde and <b>Ni-MOF (Fig. S23)</b>                                                                                                              | S-20         |
| <b>S18</b>  | Proposed radical mechanism ( <b>Fig. S24</b> )                                                                                                                                                       | S-21         |
| <b>S19</b>  | References                                                                                                                                                                                           | S-22         |

## SECTION S1

### **Materials and Physical Measurements**

All the chemicals and solvents used in the synthesis and subsequent studies were purchased from commercial sources and employed without further purification.

A comprehensive set of characterization techniques, including FTIR spectroscopy, Thermogravimetric analysis (TGA), X-ray diffractometry, Field emission scanning electron microscopy (FESEM), and X-ray photoelectron spectroscopy (XPS), was employed to thoroughly investigate the structural, morphological, and compositional features of the material. The Fourier-transform infrared (FTIR) spectra were obtained using a Shimadzu spectrometer. The samples were finely ground with KBr to form transparent pellets, and the spectra were recorded in the wavelength range of 4000-500  $\text{cm}^{-1}$ . NMR spectra were recorded on a Bruker Biospin Avance-III spectrometer operating at 400 MHz. Microscopic analysis was performed by sonicating the sample in hexane, drop-casting the suspension onto carbon tape and a copper grid, and drying it under vacuum for 30 minutes. XPS analysis was performed using a K- $\alpha$  Plus XPS system under ultra-high vacuum ( $\sim 10^{-9}$  torr) with Al K $\alpha$  radiation.

The microscopic images for Field Emission Scanning Electron Microscopy (FESEM) analysis of **Ni-MOF** were taken in JEOL instrument using a working distance of 4.5-15 mm and a voltage of 5-15 kV. For the sample preparation, the methanolic suspension was prepared by sonication for 2-3 minutes and drop-casted on a silicon wafer. The sample was dried for 30 minutes in vacuum, and coated with gold. The energy dispersive X-ray spectroscopy (EDX) for mapping of elements was also carried out with the same instrument.

TGA was carried on a Shimadzu DTG-60H analyzer using aluminum pans with samples heated from 30 to 500  $^{\circ}\text{C}$  at 10  $^{\circ}\text{C min}^{-1}$  under nitrogen flow. Elemental analysis (C, H, and N) was carried out using a Thermo Finnigan analyzer.

Powder X-ray diffraction measurements were performed on a Rigaku Ultima IV diffractometer equipped with a 3 kW sealed-tube Mo K $\alpha$  radiation source ( $\lambda = 0.71073 \text{ \AA}$ ; generator settings: 40 kV, 40 mA) and a DTex Ultra detector. Data were collected in parallel beam geometry using 2.5 $^{\circ}$  primary and secondary solar slits, a 0.5 $^{\circ}$  divergence slit, and a 10 mm height limit slit. The samples were prepared as fine powders, placed in a glass sample holder, and positioned on a rotating stage attachment.

Single-crystal X-ray diffraction data were collected on suitable Ni-MOF crystals mounted on a nylon loop with Paratone-N oil. Measurements were performed at 100 K using a Kappa APEX II diffractometer equipped with sealed-tube MoK $\alpha$  radiation, a monochromator, and a CCD detector (50 mm crystal-to-detector distance). Unit-cell determination, data integration, reflection profile fitting, and calculation of  $F^2$  and  $\sigma(F^2)$  were carried out using SAINT, followed by Lorentz and polarization corrections. The data collection was done at 100 K. The crystal centering, unit cell determination, refinement of the cell parameters and data collection was monitored through APEX3 program.<sup>S1</sup> Space-group assignment, absorption correction (SADABS)<sup>S1</sup>, data merging, and preparation of refinement files were performed via XPREP. The structure was solved with SHELXS and refined with SHELXL in Olex2.<sup>S2</sup> All non-hydrogen atoms were refined anisotropically. All figures were drawn using Mercury v3.10.2.S4, OLEX2, Viewer Lite and TOPOS Pro software.<sup>S3,S4</sup> Final refined coordinates and thermal parameters are provided in the respective CIF files.

Gas adsorption measurements were performed using a BELSORP MAX instrument at varying temperatures. Prior to the gas sorption experiments, samples degassing was done for 16 h at 120  $^{\circ}\text{C}$  under vacuum which was maintained by oil-free vacuum pump. Ultra-high-purity carrier gases (99.999% zero air and He) and oil-free pressure regulators were employed to prevent contamination during the measurement.

The ICP-MS studies were carried out with an Agilent 7850 instrument. The sample for measurement was prepared by filtering the reaction mixture three times, taking a 0.5 mL aliquot and diluting it with 4.5 mL of 10% HNO<sub>3</sub>.

The theoretical structure of the **Ni-MOF** was optimized using DMol<sup>3</sup> and Forcite simulations in BIOVIA Materials Studio 21.1.<sup>S5</sup> QTAIM analysis was conducted using Density Functional Theory (DFT) calculations performed with the Gaussian 09 software package.<sup>S6</sup> The structure was optimized using B3LYP (for C,H,N,O), which is a hybrid Becke's three parameter exchange and the Lee Yang-Par Correlation functional, and LANL2DZ (for metals) functional. A split valence basis set 6-31G+(d,p) is used for the calculation. Multiwfn and VMD softwares were used to obtain the bond critical points of the model compounds.<sup>S7,S8</sup>

## SECTION S2

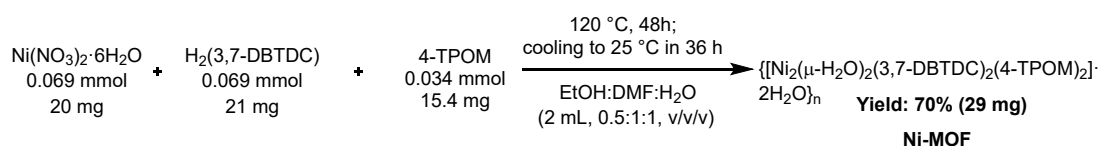

**Scheme S1.** Synthesis of Ni-MOF.

## SECTION S3

**Table S1.** Crystallographic data and structure refinement parameters for **Ni-MOF**.

| Compound                                                                                                                                                                                                                                                                                                         | Ni-MOF                                                                                        |
|------------------------------------------------------------------------------------------------------------------------------------------------------------------------------------------------------------------------------------------------------------------------------------------------------------------|-----------------------------------------------------------------------------------------------|
| Chemical formula                                                                                                                                                                                                                                                                                                 | C <sub>78</sub> H <sub>68</sub> N <sub>8</sub> Ni <sub>2</sub> O <sub>24</sub> S <sub>2</sub> |
| Formula weight (g mol <sup>-1</sup> )                                                                                                                                                                                                                                                                            | 1682.94                                                                                       |
| Temperature (K)                                                                                                                                                                                                                                                                                                  | 100.0(2)                                                                                      |
| Wavelength (Å)                                                                                                                                                                                                                                                                                                   | 0.71073                                                                                       |
| Crystal system                                                                                                                                                                                                                                                                                                   | Triclinic                                                                                     |
| Space group                                                                                                                                                                                                                                                                                                      | <i>P</i> $\bar{1}$                                                                            |
| <i>a</i> (Å)                                                                                                                                                                                                                                                                                                     | 10.2167(11)                                                                                   |
| <i>b</i> (Å)                                                                                                                                                                                                                                                                                                     | 13.6751(15)                                                                                   |
| <i>c</i> (Å)                                                                                                                                                                                                                                                                                                     | 14.3129(16)                                                                                   |
| $\alpha$ (°)                                                                                                                                                                                                                                                                                                     | 90.8060(10)                                                                                   |
| $\beta$ (°)                                                                                                                                                                                                                                                                                                      | 103.7530(10)                                                                                  |
| $\gamma$ (°)                                                                                                                                                                                                                                                                                                     | 96.5960(10)                                                                                   |
| <i>Z</i>                                                                                                                                                                                                                                                                                                         | 1                                                                                             |
| <i>V</i> (Å <sup>3</sup> )                                                                                                                                                                                                                                                                                       | 1927.8(4)                                                                                     |
| Density (g cm <sup>-3</sup> )                                                                                                                                                                                                                                                                                    | 1.450                                                                                         |
| $\mu$ (mm <sup>-1</sup> )                                                                                                                                                                                                                                                                                        | 0.627                                                                                         |
| <i>F</i> (000)                                                                                                                                                                                                                                                                                                   | 872                                                                                           |
| $\theta$ (°) Range for data coll.                                                                                                                                                                                                                                                                                | 1.47 to 25.05                                                                                 |
| Reflections collected                                                                                                                                                                                                                                                                                            | 26621                                                                                         |
| Independent reflections                                                                                                                                                                                                                                                                                          | 6805                                                                                          |
| Reflections with <i>I</i> > 2 $\sigma$ ( <i>I</i> )                                                                                                                                                                                                                                                              | 6031                                                                                          |
| <i>R</i> <sub>int</sub>                                                                                                                                                                                                                                                                                          | 0.0214                                                                                        |
| No. of parameters refined                                                                                                                                                                                                                                                                                        | 510                                                                                           |
| GOF on <i>F</i> <sup>2</sup>                                                                                                                                                                                                                                                                                     | 1.088                                                                                         |
| <i>R</i> <sub>1</sub> <sup>a</sup> / <i>wR</i> <sub>2</sub> <sup>b</sup> ( <i>I</i> > 2 $\sigma$ ( <i>I</i> ))                                                                                                                                                                                                   | 0.0415/0.1150                                                                                 |
| <i>R</i> <sub>1</sub> <sup>a</sup> / <i>wR</i> <sub>2</sub> <sup>b</sup> (all data)                                                                                                                                                                                                                              | 0.0490/0.1285                                                                                 |
| Largest diff. peak and hole (e Å <sup>-3</sup> )                                                                                                                                                                                                                                                                 | 0.896 and -0.793                                                                              |
| <sup>a</sup> <i>R</i> <sub>1</sub> = $\Sigma  \text{Fo}  -  \text{Fc}  /\Sigma \text{Fo} $ . <sup>b</sup> <i>wR</i> <sub>2</sub> = $[\Sigma w(\text{F}_o^2 - \text{F}_c^2)^2/\Sigma w(\text{F}_o^2)]^{1/2}$ ,<br>where $w = 1/[\sigma^2(\text{F}_o^2) + (aP)^2 + bP]$ , $P = (\text{F}_o^2 + 2\text{F}_c^2)/3$ . |                                                                                               |

## SECTION S4

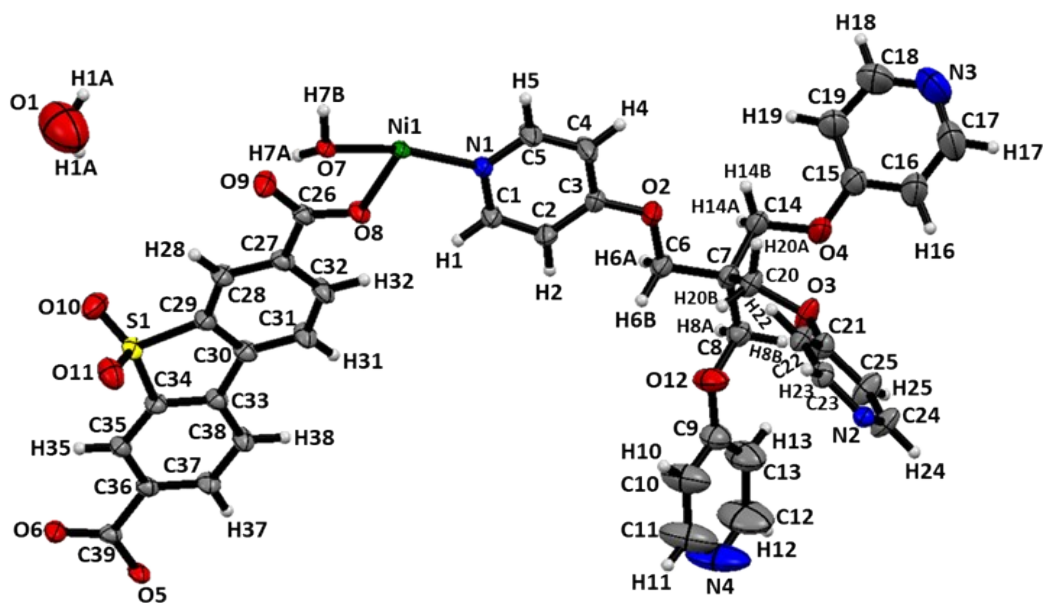

**Fig. S1** ORTEP diagram of the asymmetric unit in Ni-MOF where nonhydrogen atoms are represented with ellipsoids at the 50% probability level.

## SECTION S5

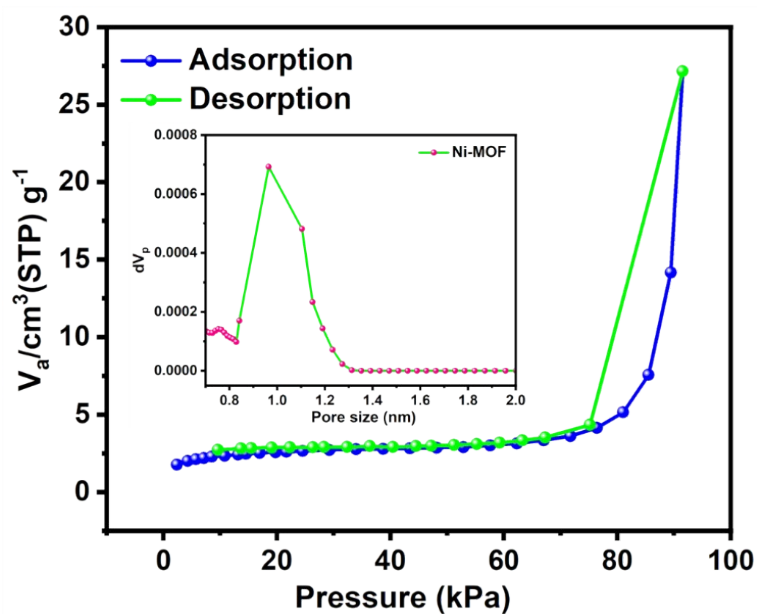

**Fig. S2** Nitrogen sorption isotherm at 77 K (inset showing pore size analysis using the GCMC method).

## SECTION S6

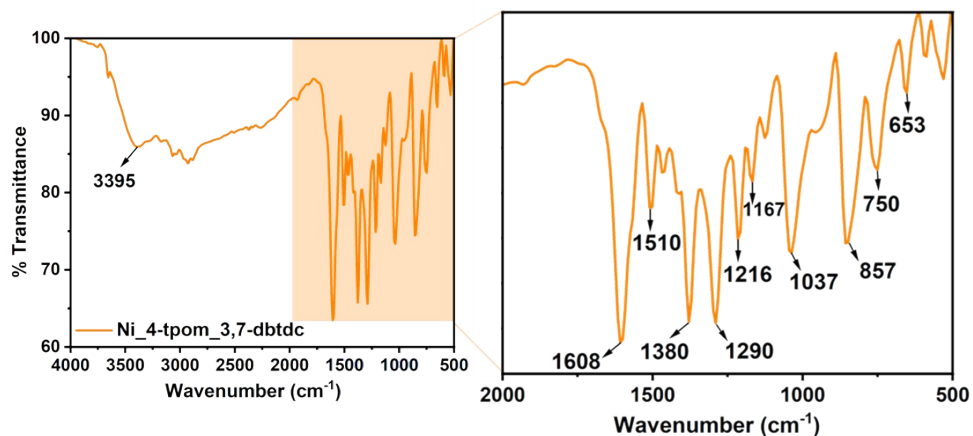

Fig. S3 FTIR spectra of as-synthesized Ni-MOF.

## SECTION S7

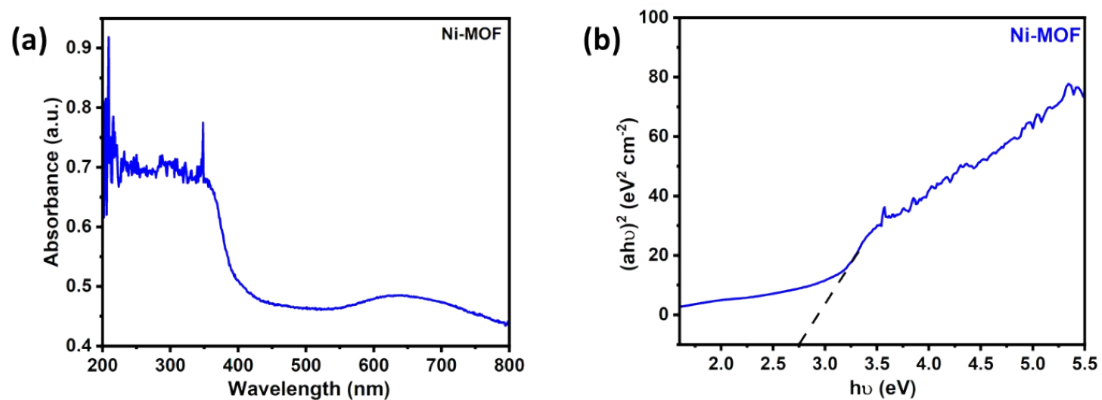

Fig. S4 (a) DRS and (b) Tauc plot of as-synthesized Ni-MOF.

## SECTION S8

### <sup>1</sup>H NMR spectra of the crude product

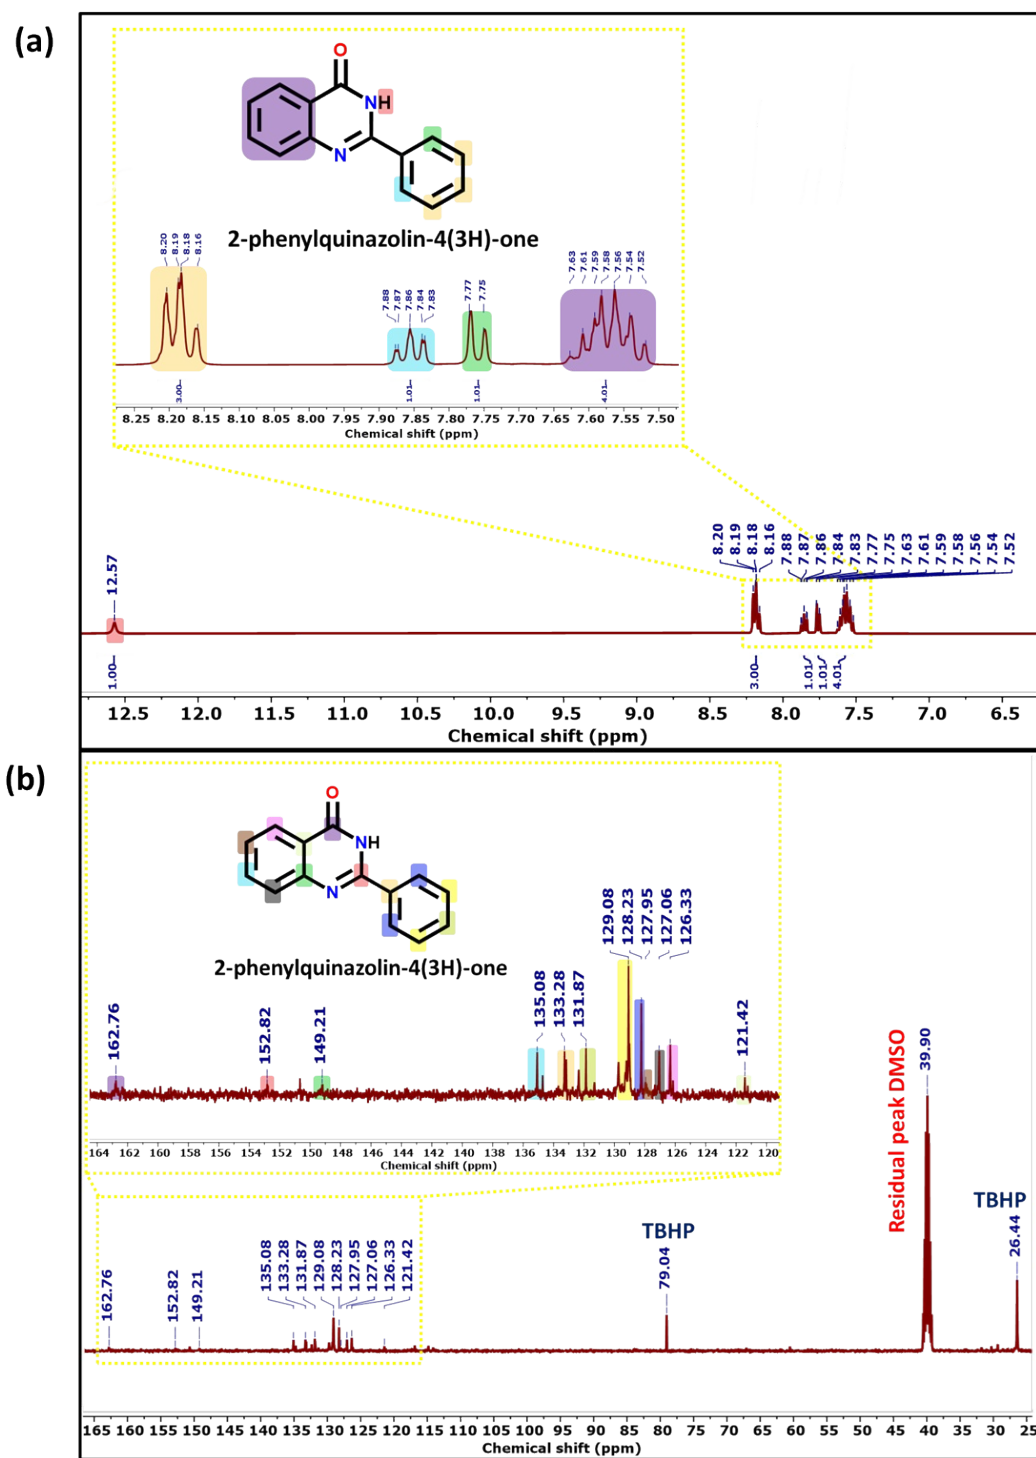

**Fig. S5** (a) <sup>1</sup>H and (b) <sup>13</sup>C NMR spectra of the product (in DMSO-d<sub>6</sub>) for the entry 4 in Table 1, where 1 mol% Ni-MOF and 50 μL TBHP (70% in water) was used.

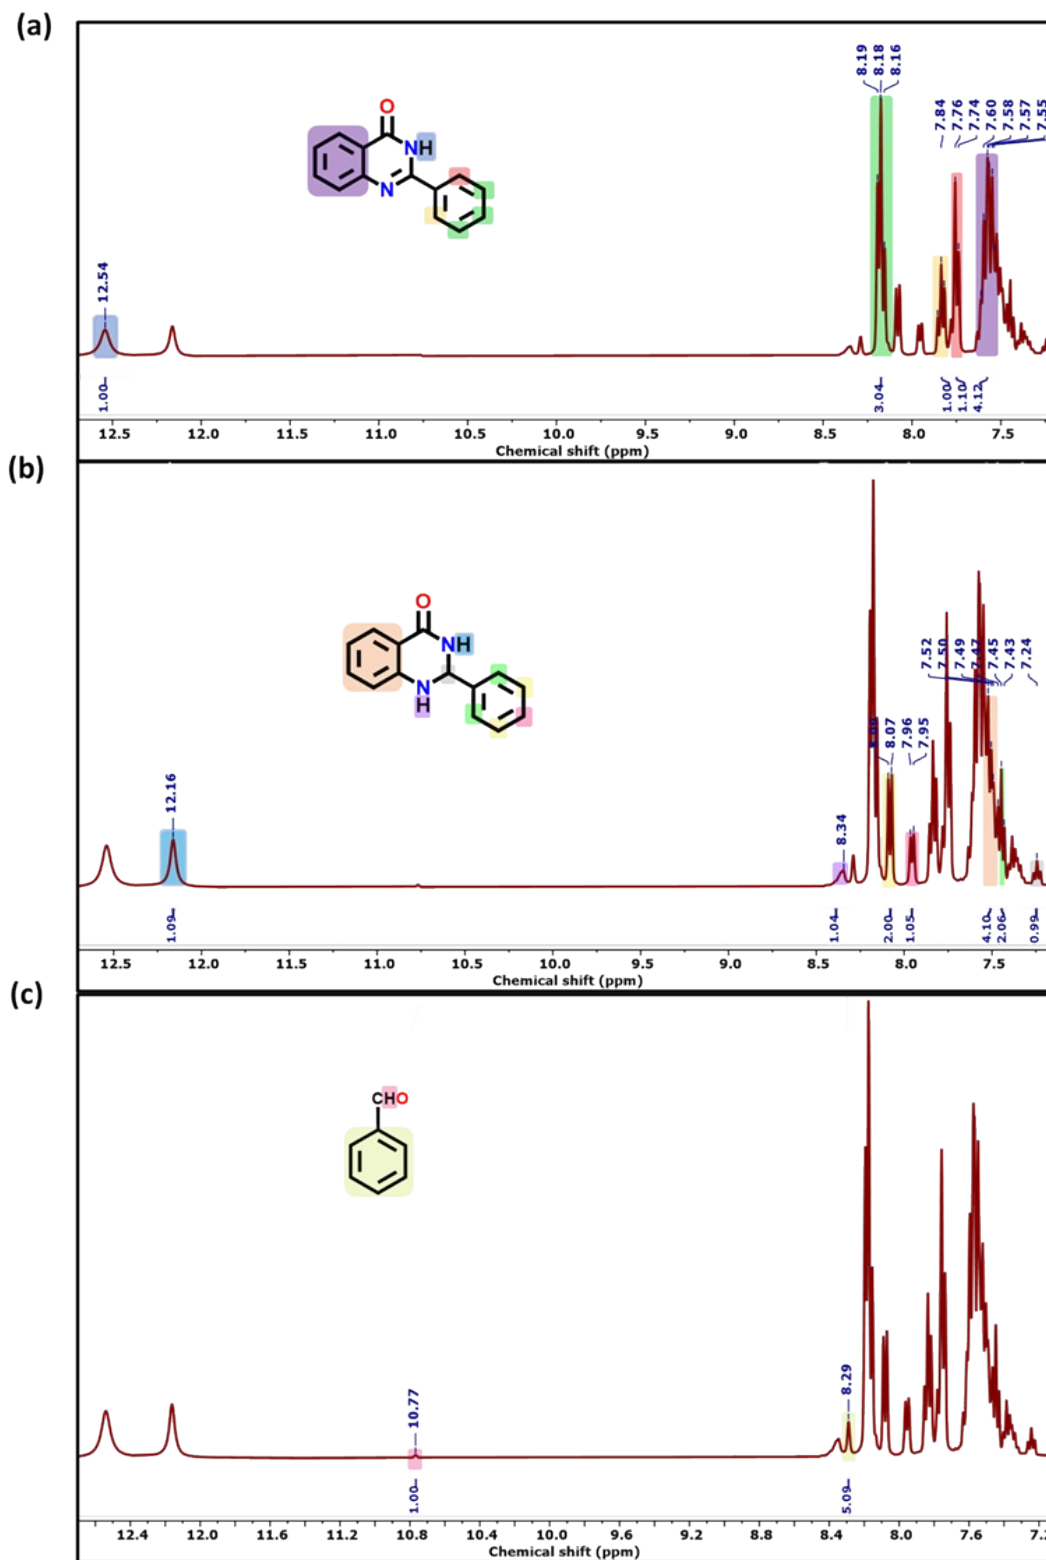

**Fig. S6** <sup>1</sup>H NMR spectra of the crude product (in DMSO-d<sub>6</sub>) displaying signals for the (a) product, (b) intermediate B and (c) reactant for the entry 8 in Table 1, where 2 mol % Ni-MOF and 50 μL TBHP (70% in water) was used.



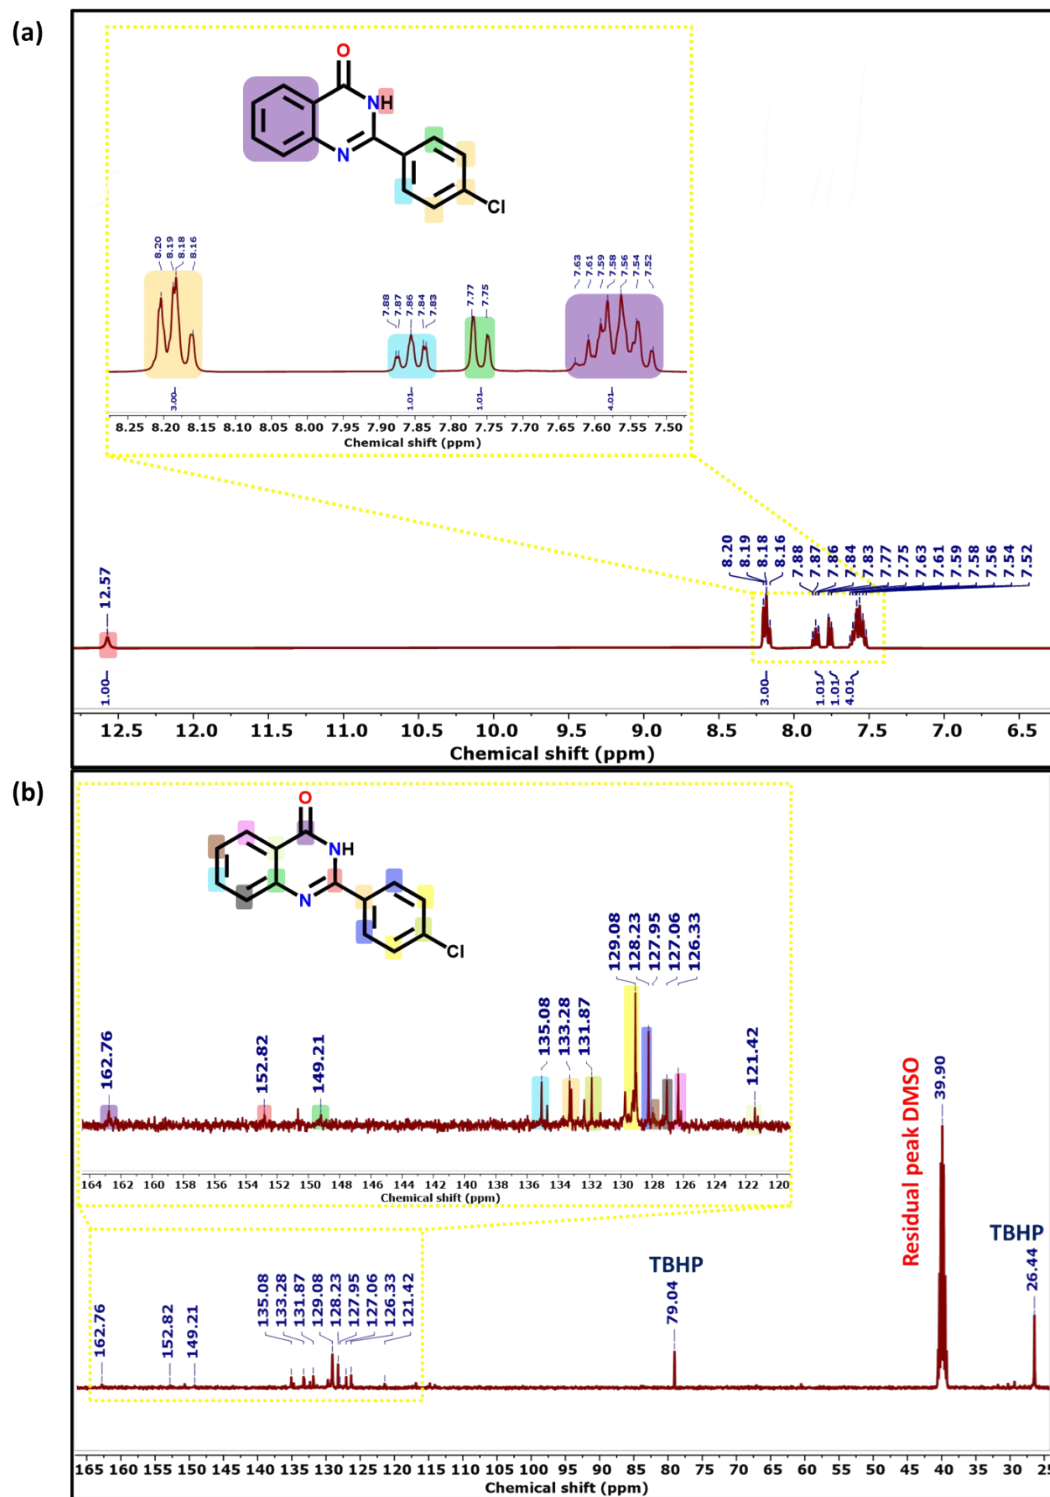

**Fig. S8** (a) <sup>1</sup>H and (b) <sup>13</sup>C NMR spectra of the isolated product (in DMSO-d<sub>6</sub>) for the entry 2 in Table 2, where 2 mol% Ni-MOF and 50 μL TBHP (70% in water) was used.

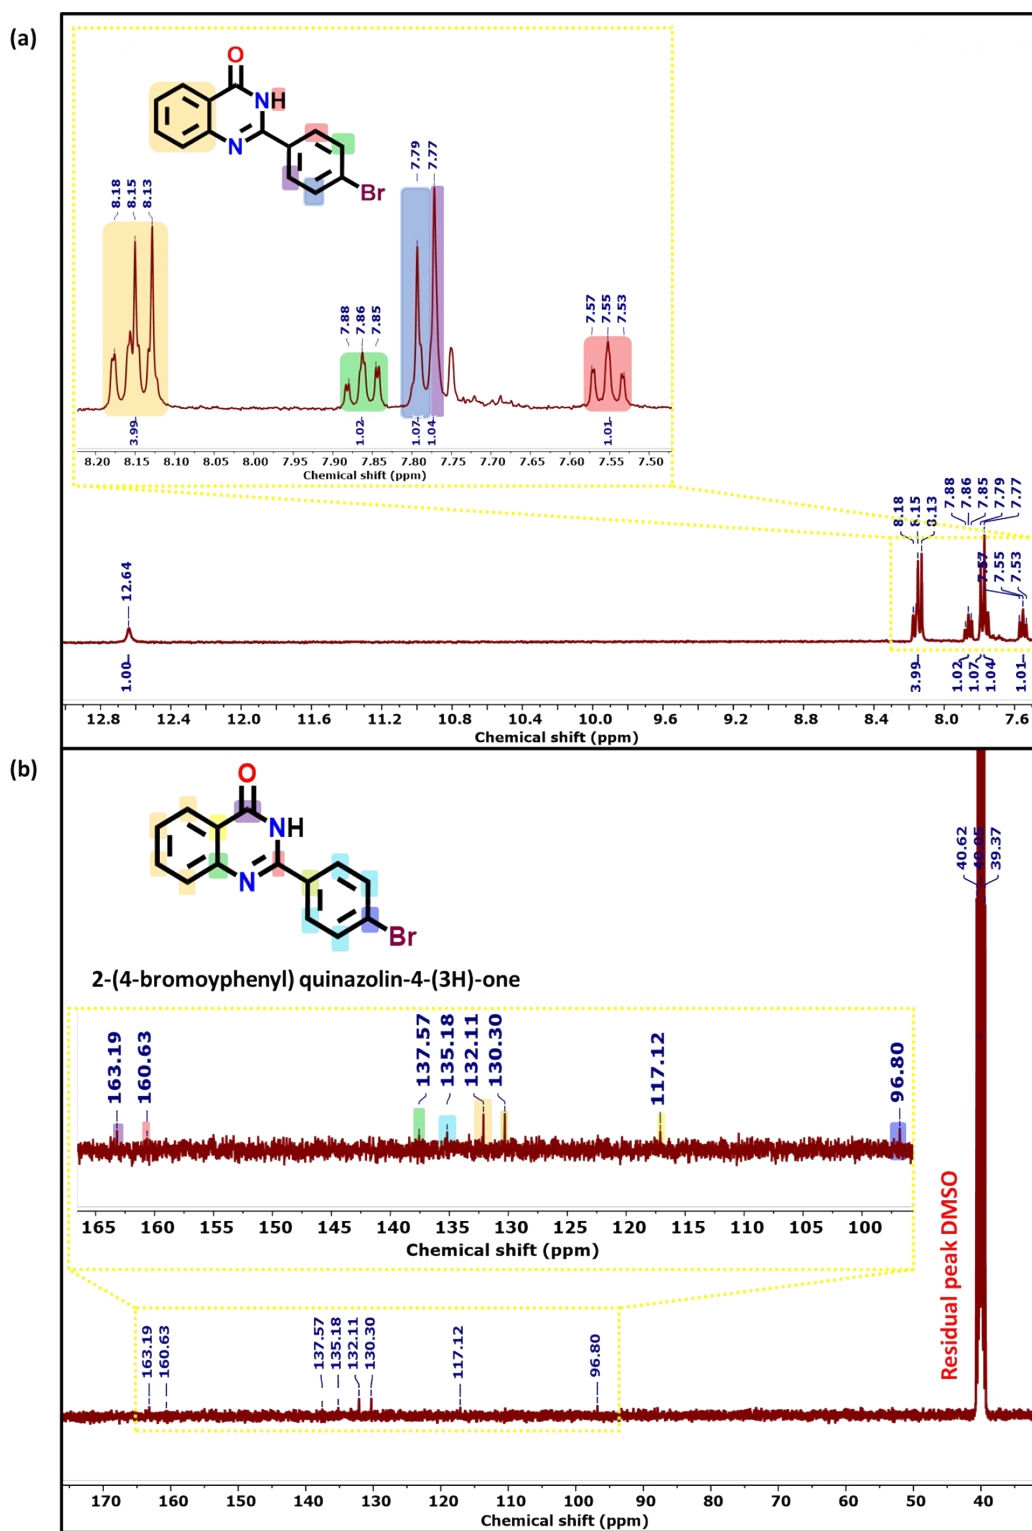

**Fig. S9** (a) <sup>1</sup>H and (b) <sup>13</sup>C NMR spectra of the isolated product (in DMSO-d<sub>6</sub>) for the entry 3 in Table 2, where 2 mol% Ni-MOF and 50 μL TBHP (70% in water) was used.

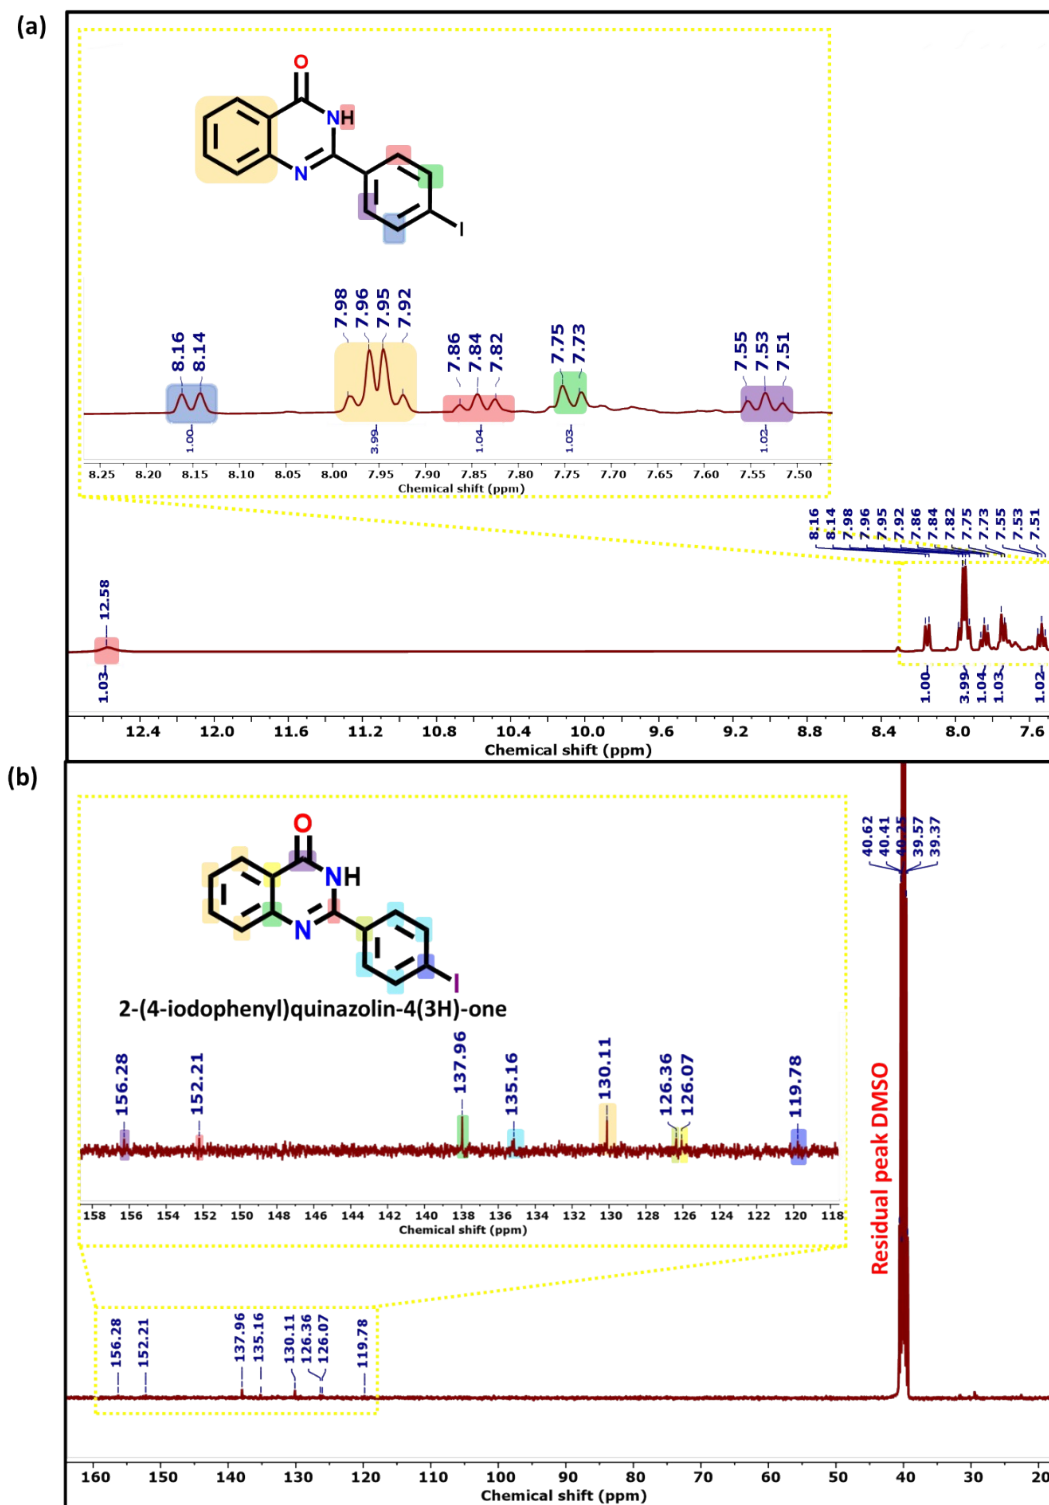

**Fig. S10** (a)  $^1\text{H}$  and (b)  $^{13}\text{C}$  NMR spectra of the isolated product (in DMSO- $d_6$ ) for the entry 4 in Table 2, where 2 mol% Ni-MOF and 50  $\mu\text{L}$  TBHP (70% in water) was used.

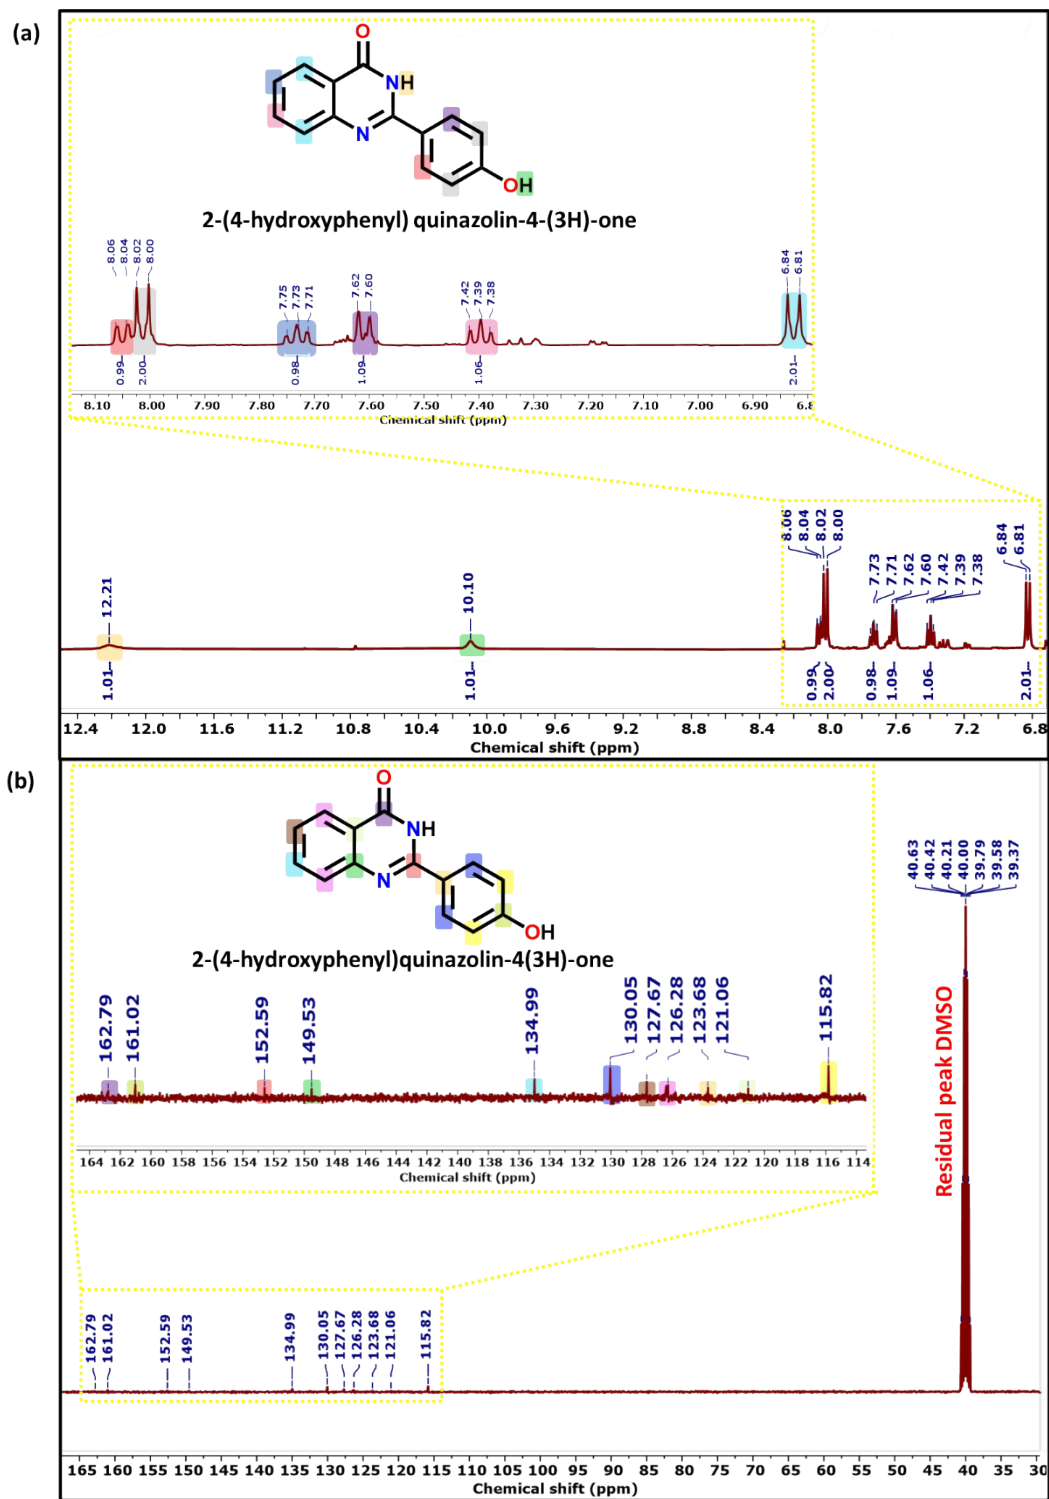

**Fig. S11** (a)  $^1\text{H}$  and (b)  $^{13}\text{C}$  NMR spectra of the isolated product (in DMSO- $d_6$ ) for the entry 5 in Table 2, where 2 mol% Ni-MOF and 50  $\mu\text{L}$  TBHP (70% in water) was used.

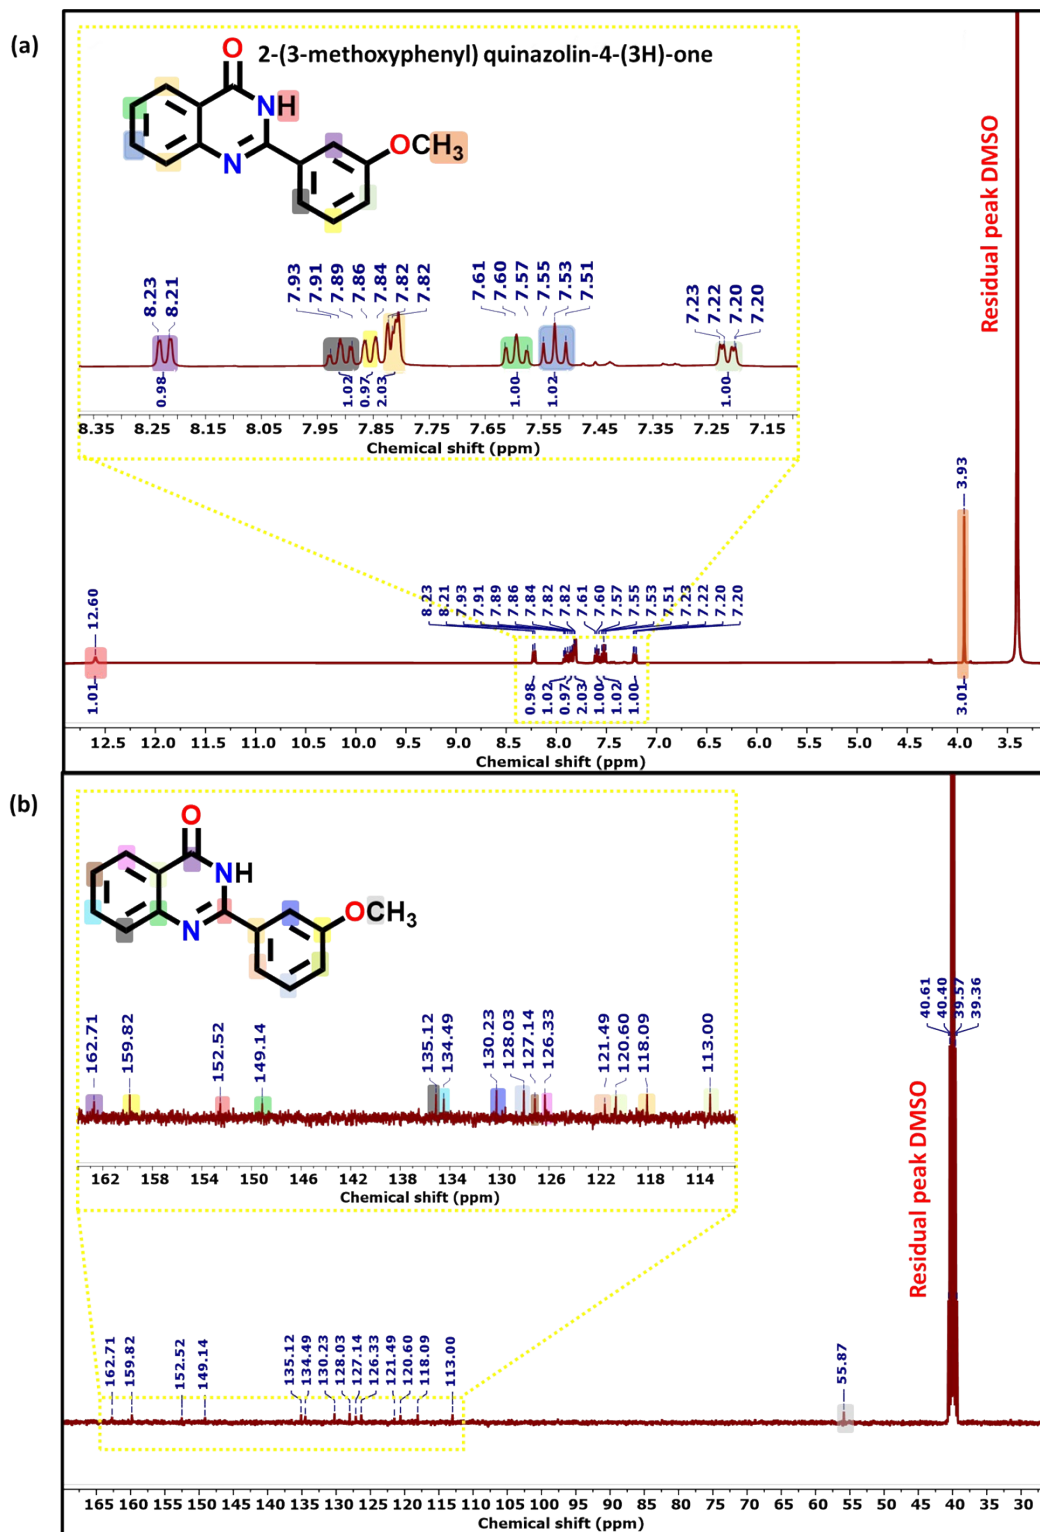

**Fig. S12** (a) <sup>1</sup>H and (b) <sup>13</sup>C NMR spectra of the isolated product (in DMSO-d<sub>6</sub>) for the entry 6 in Table 2, where 2 mol% Ni-MOF and 50 μL TBHP (70% in water) was used.

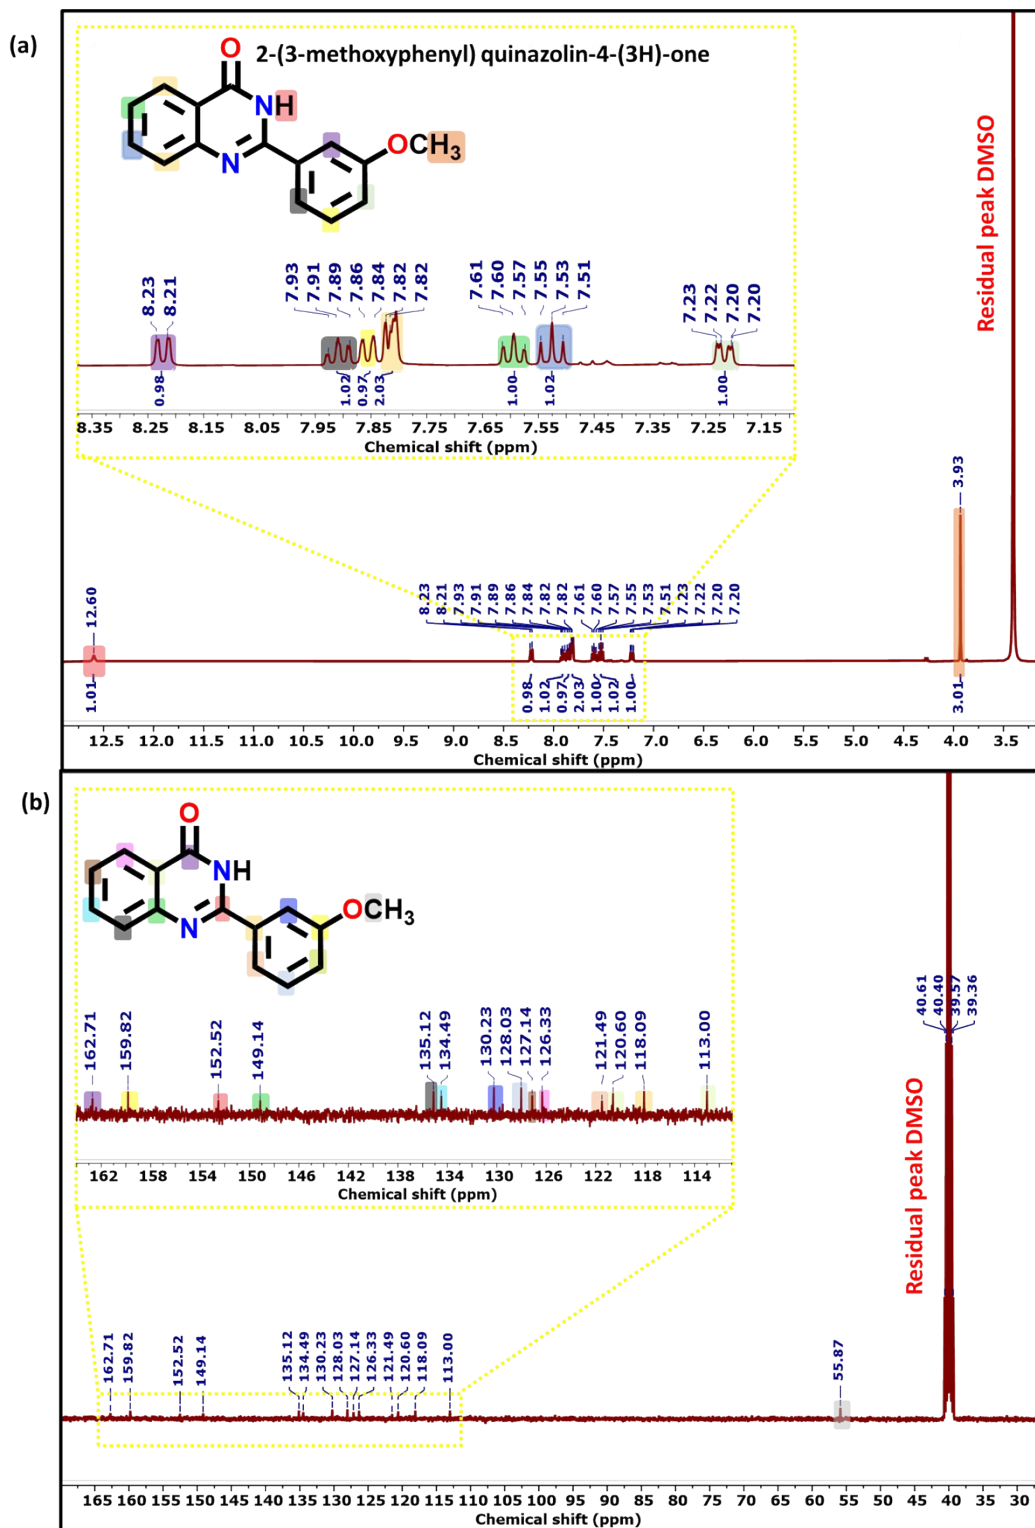

**Fig. S13** (a) <sup>1</sup>H and (b) <sup>13</sup>C NMR spectra of the isolated product (in DMSO-d<sub>6</sub>) for the entry 7 in Table 2, where 2 mol% Ni-MOF and 50 μL TBHP (70% in water) was used.

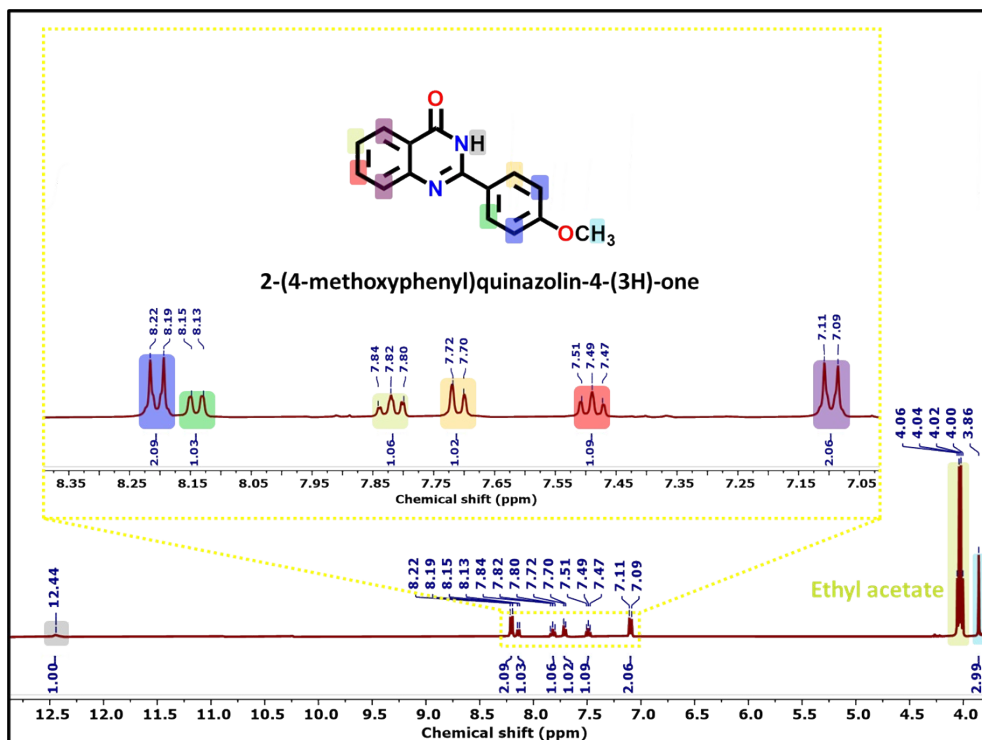

**Fig. S14** (a)  $^1\text{H}$  NMR spectra of the isolated product (in DMSO- $d_6$ ) for the entry 8 in Table 2, where 2 mol% Ni-MOF and 50  $\mu\text{L}$  TBHP (70% in water) was used.

## SECTION S10

**Table S2.** Comparison of catalytic performance of Ni-MOF with relevant catalysts used for the synthesis of quinazolinones.

| Sr. No. | Catalytic system                                                                                                        | Catalyst amount | Oxidant (amount)                                              | Temp. ( $^{\circ}\text{C}$ )/Light source | Time (h) | Solvent                                    | Yield | Reference                                                          |
|---------|-------------------------------------------------------------------------------------------------------------------------|-----------------|---------------------------------------------------------------|-------------------------------------------|----------|--------------------------------------------|-------|--------------------------------------------------------------------|
| 1.      | Ni-MOF                                                                                                                  | 2 mol%          | TBHP (70% in $\text{H}_2\text{O}$ ) (50 $\mu\text{L}$ )       | 90                                        | 6        | $\text{H}_2\text{O}:\text{THF}$ (4:1, v/v) | 99.9  | This work                                                          |
| 2.      | $[\text{Cu}^{\text{I}}_4(4,4'\text{-bipy})_7(\text{H}_2\text{PMo}_9\text{V}_3\text{O}_{40})] \cdot 2\text{H}_2\text{O}$ | 1.2 mmol%       | $\text{O}_2$                                                  | 90                                        | 1        | Dichloro ethane (DCE)                      | 99    | <i>ACS Appl. Mater. Interfaces</i> , 2024, <b>16</b> , 49400–49410 |
| 3.      | SDUT-21                                                                                                                 | 10 mg           | TBHP (5.5 mol $\text{L}^{-1}$ )                               | 80                                        | 12       | DCE                                        | 99    | <i>Inorg. Chem.</i> , 2023, <b>62</b> , 5565–5575                  |
| 4.      | SDUT-22                                                                                                                 | 10 mg           | TBHP (5.5 mol $\text{L}^{-1}$ )                               | 80                                        | 12       | DCE                                        | 53    | <i>Inorg. Chem.</i> , 2023, <b>62</b> , 5565–5575                  |
| 5.      | $\text{Cu}_2\text{O}$ nanoparticles                                                                                     | 20 mol%         | $\text{NaN}_3^{\text{a}}$                                     | 80                                        | 26       | PEG-400                                    | 92    | <i>Green Chem.</i> , 2024, <b>26</b> , 4723–4732                   |
| 6.      | $\text{Fe}-\text{Fe}_3\text{C}@\text{NC}-800$                                                                           | 4 mol%          | 30% $\text{H}_2\text{O}_2$ in $\text{H}_2\text{O}$ (0.4 mmol) | 100                                       | 12       | $\text{H}_2\text{O}:\text{THF}$ (4:1)      | 91    | <i>Chem. Sci.</i> , 2019, <b>10</b> , 10283–10289                  |
| 7.      | Zn(II) stabilized amidyl radical                                                                                        | 5 mol%          | $\text{LiO}^{\text{t}}\text{Bu}^{\text{b}}$                   | 120                                       | 24       |                                            | 86    | <i>Chem. Commun.</i> , 2024, <b>60</b> , 7097–7100                 |
| 8.      | Mn-based heterocycle                                                                                                    | 5 mol%          | $\text{NaO}^{\text{t}}\text{Bu}^{\text{b}}$                   | 140                                       | 36       | Xylene                                     | 76    | <i>Catal. Sci. Technol.</i> , 2022, <b>12</b> , 3202–3208          |
| 9.      | Supramolecular assembly of Qx-Ind                                                                                       | 1 mol%          | air                                                           | 12 W white LED                            | 36       | $\text{H}_2\text{O}:\text{DMSO}$ (9:1)     | 88    | <i>ACS Appl. Mater. Interfaces</i> , 2024, <b>16</b> , 67683–67696 |

<sup>a</sup>used as a reactant; <sup>b</sup>a base is used.

## SECTION S11

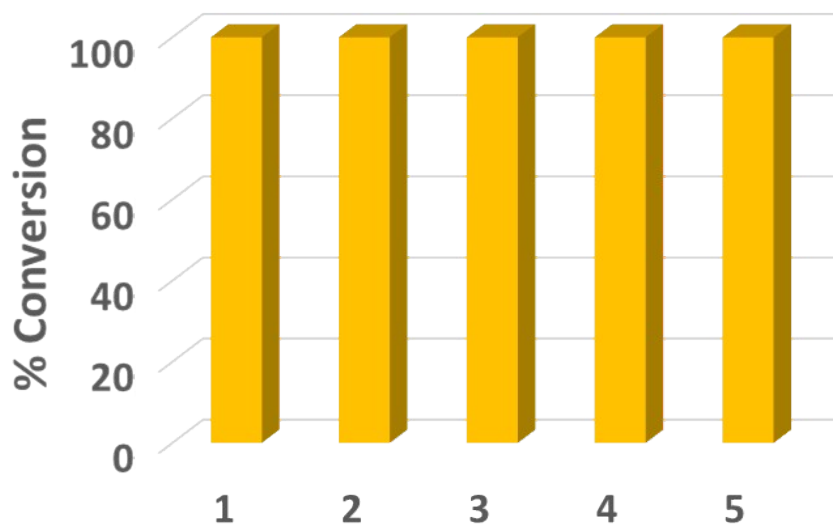

**Fig. S15** Bar graph showing percentage conversion versus number of catalytic cycles showing the recyclability of Ni-MOF catalyst for the synthesis of quinazolinones from 2-aminobenzamide and benzaldehyde.

## SECTION S12

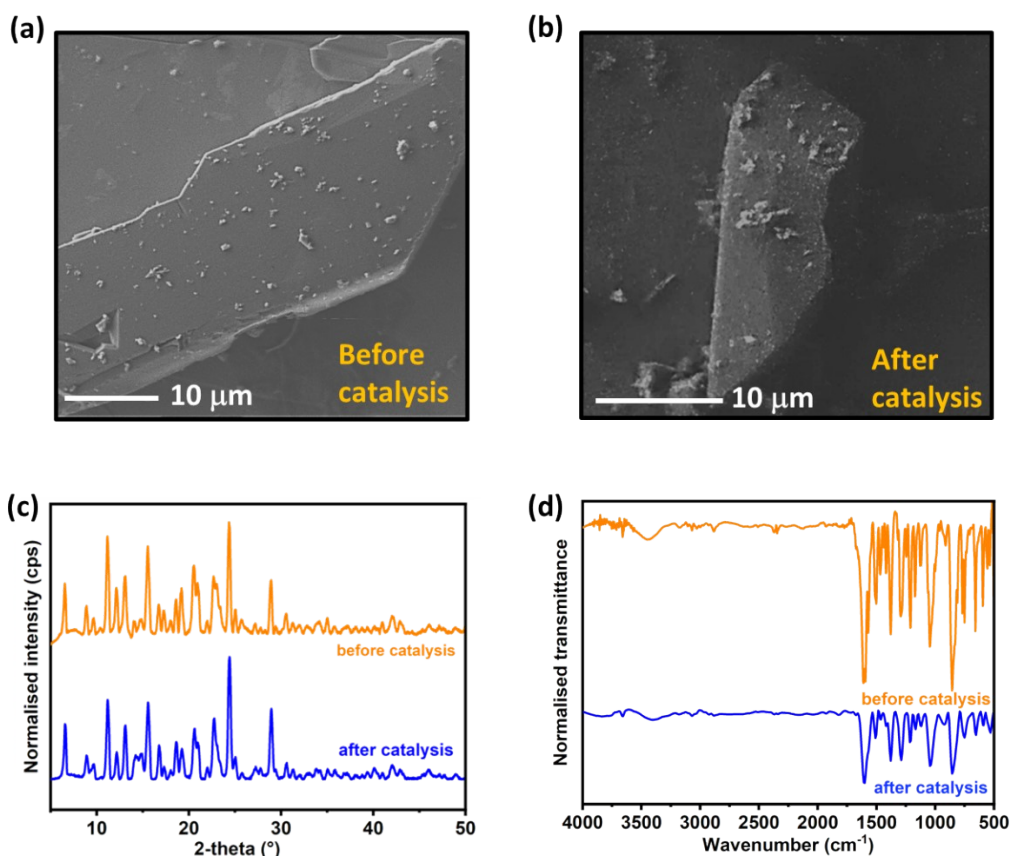

**Fig. S16** Characterization of Ni-MOF before and after catalysis: (a,b) FESEM data, (c) powder X-ray diffractograms, and (d) FTIR spectra.

## SECTION S13

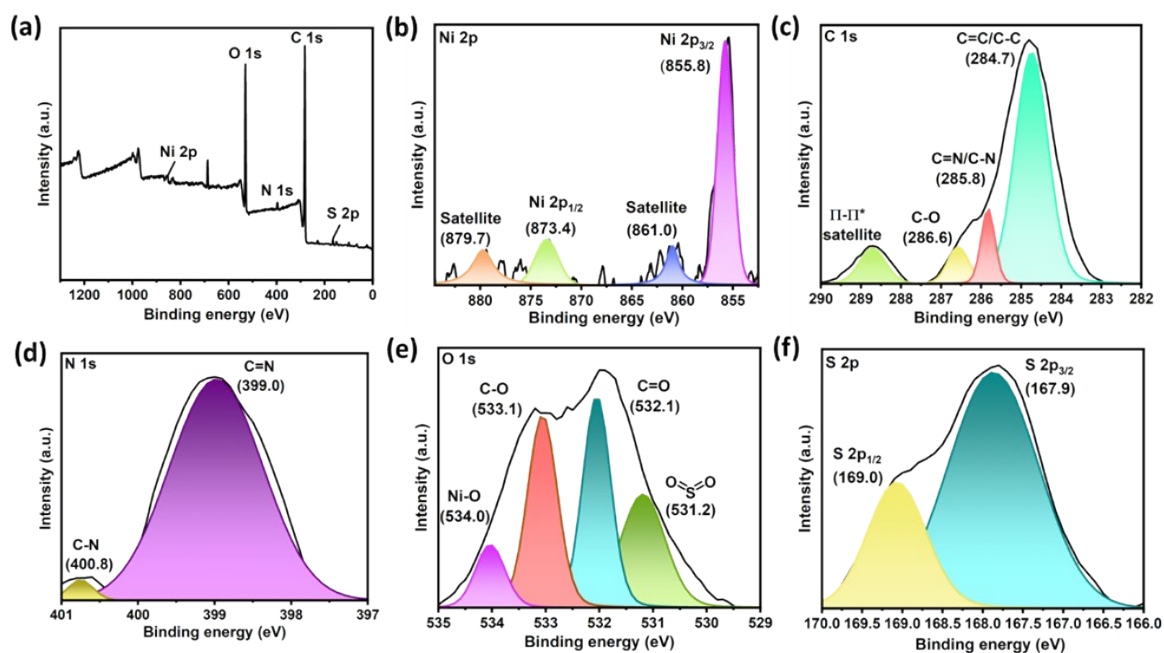

**Fig. S17** X-ray photoelectron spectrum displaying (a) the full overlay and Deconvoluted XPS spectra of individual elements (b) Ni 2p, (c) C 1s, (d) N 1s, (e) O 1s and (f) S 2p of Ni-MOF after catalysis.

## SECTION S14

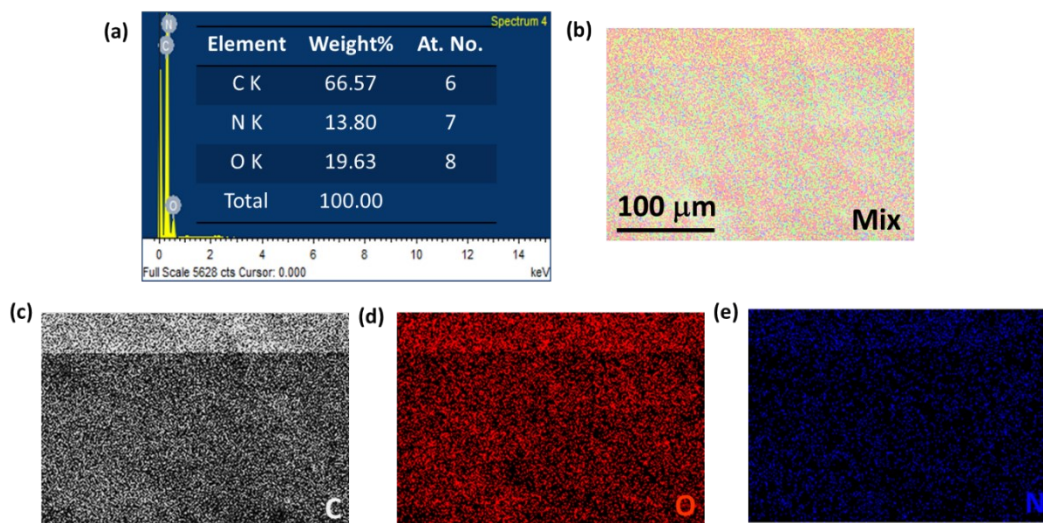

**Fig. S18** (a) EDX examination and (b-e) Elemental mapping of the post-catalysis filtrate separation done by centrifugation and filtration followed by solvent evaporation.

## SECTION S15

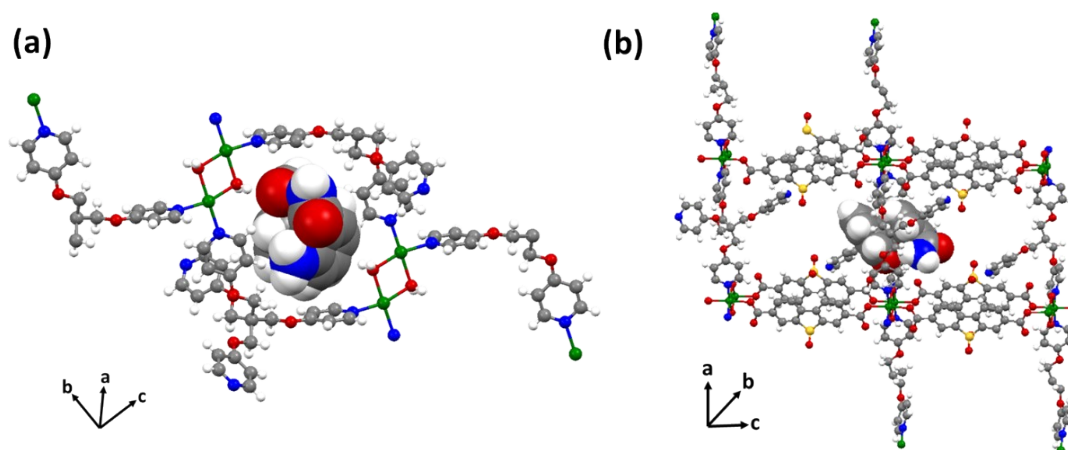

**Fig. S19** Perspective views of the Ni-MOF structure along (a) the bc plane and (b) the ac plane, illustrating the encapsulation of benzaldehyde and 2-aminobenzamide within the pocket.

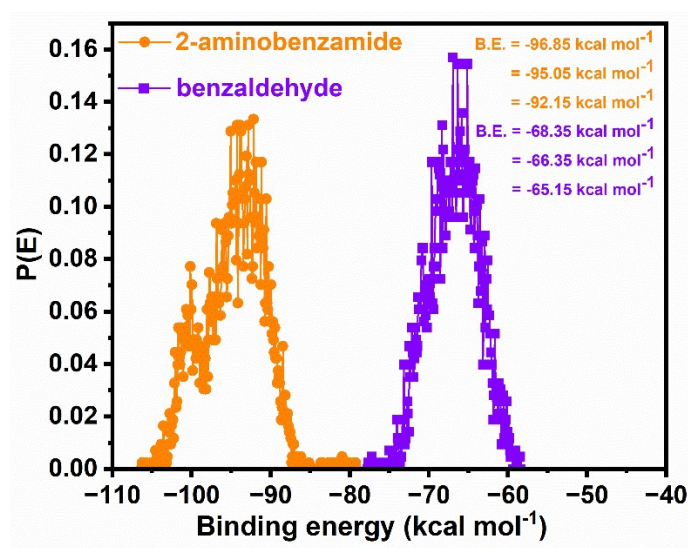

**Fig. S20** Line profile showing binding energies of Ni-MOF after interaction with benzaldehyde and 2-aminobenzamide.

### Model compounds for simulations

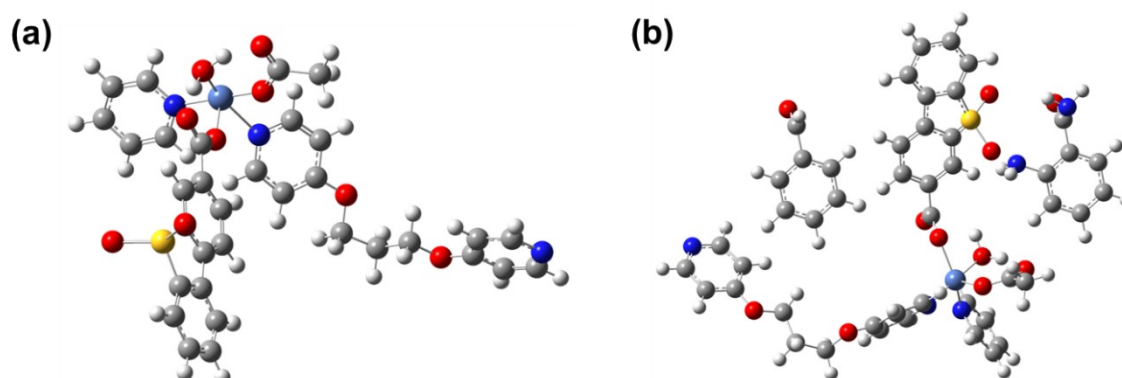

**Fig. S21** Model compound replicating the Ni-MOF coordination environment: (a) Ni-O fragment; (b) optimized positioning of reactant molecules (2-aminobenzamide and benzaldehyde) near the Ni-MOF site via DFT simulations namely Ni-R.

**Table S3.** Optimized Ni-R Bond Critical Point (BCP) parameters from QTAIM analysis.

| Bond Critical Point (BCP) | Distance (Å) | $\nabla^2\rho(r)$<br>Laplacian of electron density | G(r)<br>Lagrangian kinetic energy | V(r)<br>Potential energy density | H(r)<br>Total energy density | -G(r)/V(r) |
|---------------------------|--------------|----------------------------------------------------|-----------------------------------|----------------------------------|------------------------------|------------|
| 165<br>32(O)---88(H)      | 2.855        | 0.193580970<br>2E-01                               | 0.365457107<br>8E-02              | -0.246961790<br>0E-02            | 0.118495317<br>8E-02         | 1.48       |
| 175<br>15(H)---100(H)     | 2.548        | 0.110227952<br>3E-01                               | 0.203580977<br>9E-02              | -0.131592075<br>1E-02            | 0.719889028<br>5E-03         | 1.55       |
| 197<br>19(C)---99(H)      | 2.462        | 0.367558373<br>3E-01                               | 0.788202443<br>9E-02              | -0.657508954<br>6E-02            | 0.130693489<br>3E-02         | 1.20       |
| 199<br>108(N)---69(H)     | 2.011        | 0.11542900<br>28                                   | 0.289885542<br>0E-01              | -0.291198576<br>9E-01            | 0.131303495<br>1E-03         | 1.00       |
| 238<br>107(H)---74(O)     | 2.831        | 0.218937817<br>6E-01                               | 0.451626143<br>7E-02              | -0.355907743<br>6E-02            | 0.9571840014<br>E-03         | 1.27       |
| 239<br>90(O)---74(O)      | 3.373        | 0.195126520<br>1E-01                               | 0.416288244<br>1E-02              | -0.344760188<br>0E-02            | 0.715280561<br>0E-03         | 1.21       |

### SECTION S16

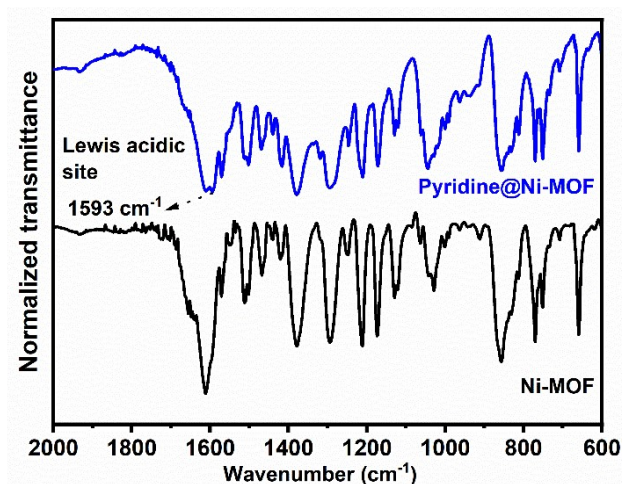

**Fig. S22** FTIR spectra of Ni-MOF and pyridine treated Ni-MOF.

### SECTION S17

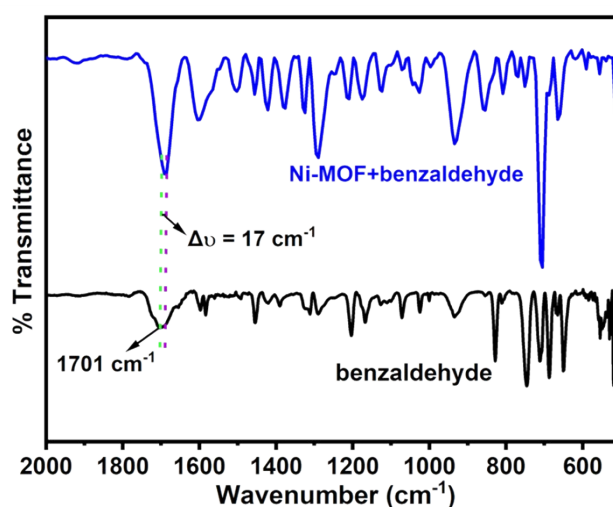

**Fig. S23** Spectroscopic Evidence of interaction between benzaldehyde and Ni-MOF.

## SECTION S18

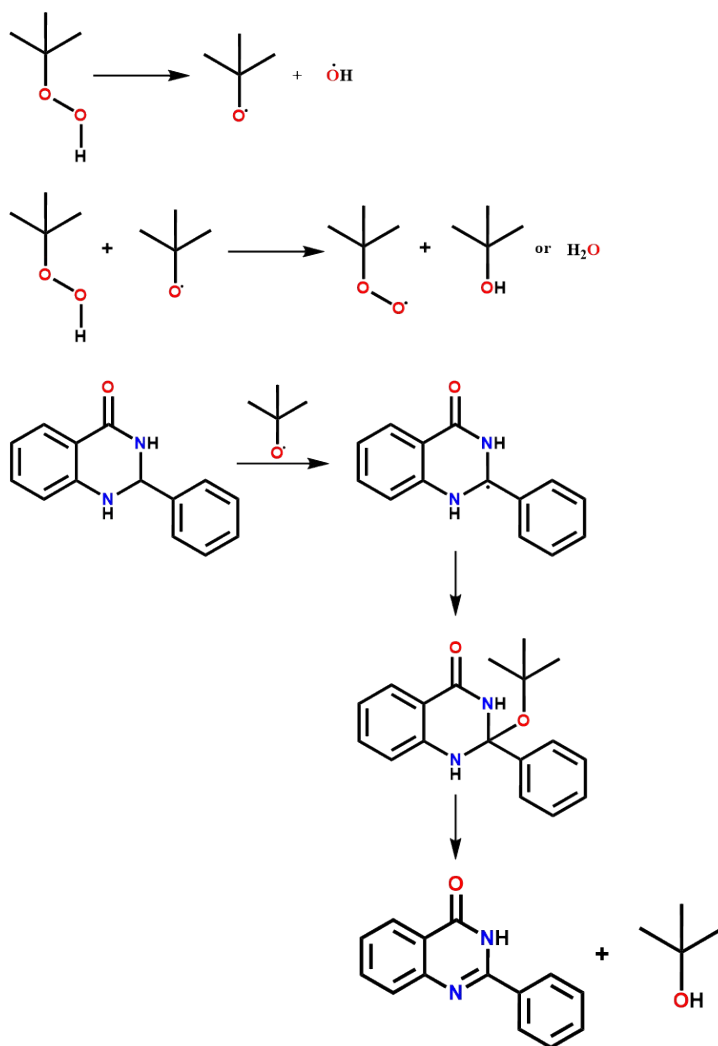

### Inhibition by radical scavenger

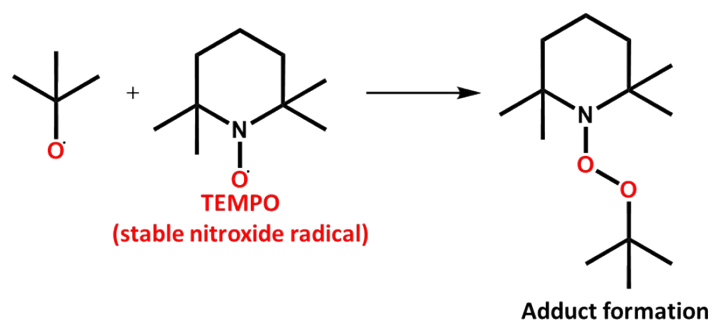

**Fig. S24** Proposed radical mechanism for Dihydroquinazolinone to Quinazolinone Conversion and the adduct formation in presence of TEMPO.

## SECTION S19

### References

- (S1) APEX2, SADABS, and SAINT; Bruker AXS Inc., Madison, WI, USA, 2008.
- (S2) O. V. Dolomanov, L. J. Bourhis, R. J. Gildea, J. A. K. Howard, H. Puschmann, H. J. *Appl. Crystallogr.*, 2009, **42**, 339–341.
- (S3) C. F. Macrae, I. J. Bruno, J. A. Chirsholm, P. R. Edgington, P. McCabe, L. Monge, R. Taylor, J. van de Streek, P. A. Wood. *J. Appl. Crystallogr.*, 2008, **41**, 466-470.
- (S4) V. A. Blatov, A. P. Shevchenko, D.M. Proserpio. *Cryst. Growth Des.*, 2014, **14**, 3576–3586.
- (S5) Dassault Systèmes BIOVIA, ViewerLite 5.0, San Diego: Dassault Systèmes, 2002.
- (S6) M. J. Frisch, G. W. Trucks, H. B. Schlegel, G. E. Scuseria, M. A. Robb, J. R. Cheeseman, G. Scalmani, V. Barone, B. Mennucci, G. A. Petersson, H. Nakatsuji, M. Caricato, X. Li, H. P. Hratchian, A. F. Izmaylov, J. Bloino, G. Zheng, J. L. Sonnenberg, M. Hada, M. Ehara, K. Toyota, R. Fukuda, J. Hasegawa, M. Ishida, T. Nakajima, Y. Honda, O. Kitao, H. Nakai, T. Vreven, J. A. Montgomery, J. E. Peralta, F. Ogliaro, M. Bearpark, J. J. Heyd, E. Brothers, K. N. Kudin, V. N. Staroverov, R. Kobayashi, J. Normand, K. Raghavachari, A. Rendell, J. C. Burant, S. S. Iyengar, J. Tomasi, M. Cossi, N. Rega, J. M. Millam, M. Klene, J. E. Knox, J. B. Cross, V. Bakken, C. Adamo, J. Jaramillo, R. Gomperts, R. E. Stratmann, O. Yazyev, A. J. Austin, R. Cammi, C. Pomelli, J. W. Ochterski, R. L. Martin, K. Morokuma, V. G. Zakrzewski, G. A. Voth, P. Salvador, J. J. Dannenberg, S. Dapprich, A. D. Daniels, Ö. Farkas, J. B. Foresman, J. V. Ortiz, J. Cioslowski, D. J. Fox, Gaussian 09; Gaussian: Wallingford, CT, USA, 2013.
- (S7) T. Lu, F. Chen. *J. Comput. Chem.*, 2012, **33**, 580-592.
- (S8) W. Humphrey, A. Dalke, K. Schulten. *J. Molec. Graphics*, 1996, **14**, 33-38.
